# Supplementary material for: Thiourea Derivative Metal Complexes: Spectroscopic, Anti-Microbial Evaluation, ADMET, Toxicity, and Molecular Docking Studies
Source: MDPI journal article supplement (doi:10.3390/inorganics11100390), 2023-09-30

## **Nano-thiourea derivative metal complexes**

### **Spectroscopic, anti-microbial evaluation, ADMET, toxicity, and molecular docking studies**

**Ahmed T. F. Al-Halbosy <sup>1</sup>, Adnan A. Hamada <sup>1</sup>, Ahmed S. Faihan <sup>1</sup>, Abdulrahman M. Saleh <sup>2</sup>, Tarek A. Yousef <sup>3,4,\*</sup>, Mortaga M. Abou-Krishna <sup>3,5</sup>, Mona H. Alhalafi <sup>6</sup> and Ahmed S. M. Al-Janabi <sup>1,\*</sup>**

- <sup>1</sup> Department of Chemistry, College of Science, Tikrit University, Tikrit 34001, Iraq; ahmed.t.farag.chem616@st.tu.edu.iq (A.T.F.A.-H.); adnanorganic2020@gmail.com (A.A.H.); a-s.faihan@tu.edu.iq (A.S.F.)
- <sup>2</sup> Pharmaceutical Medicinal Chemistry & Drug Design Department, Faculty of Pharmacy, Al-Azhar University, Cairo 11884, Egypt; abdo.saleh240@azhar.edu.eg
- <sup>3</sup> College of Science, Chemistry Department, Imam Mohammad Ibn Saud Islamic University, Riyadh 11623, Saudi Arabia; mmaboukrisha@imamu.edu.sa
- <sup>4</sup> Department of Toxic and Narcotic Drug, Forensic Medicine, Mansoura Laboratory, Medicolegal Organization, Ministry of Justice, Cairo 11435, Egypt
- <sup>5</sup> Department of Chemistry, South Valley University, Qena 83523, Egypt
- <sup>6</sup> Department of Chemistry, College of Science Al-Zulfi, Majmaah University, Al-Majmaah 11952, Saudi Arabia; m.alhalafi@mu.edu.sa
- \* Correspondence: tayousef@imamu.edu.sa (T.A.Y.); dr.ahmed.chem@tu.edu.iq (A.S.M.A.-J.)

**Fig. S1:** IR spectrum of complex **HPMCT** ligand

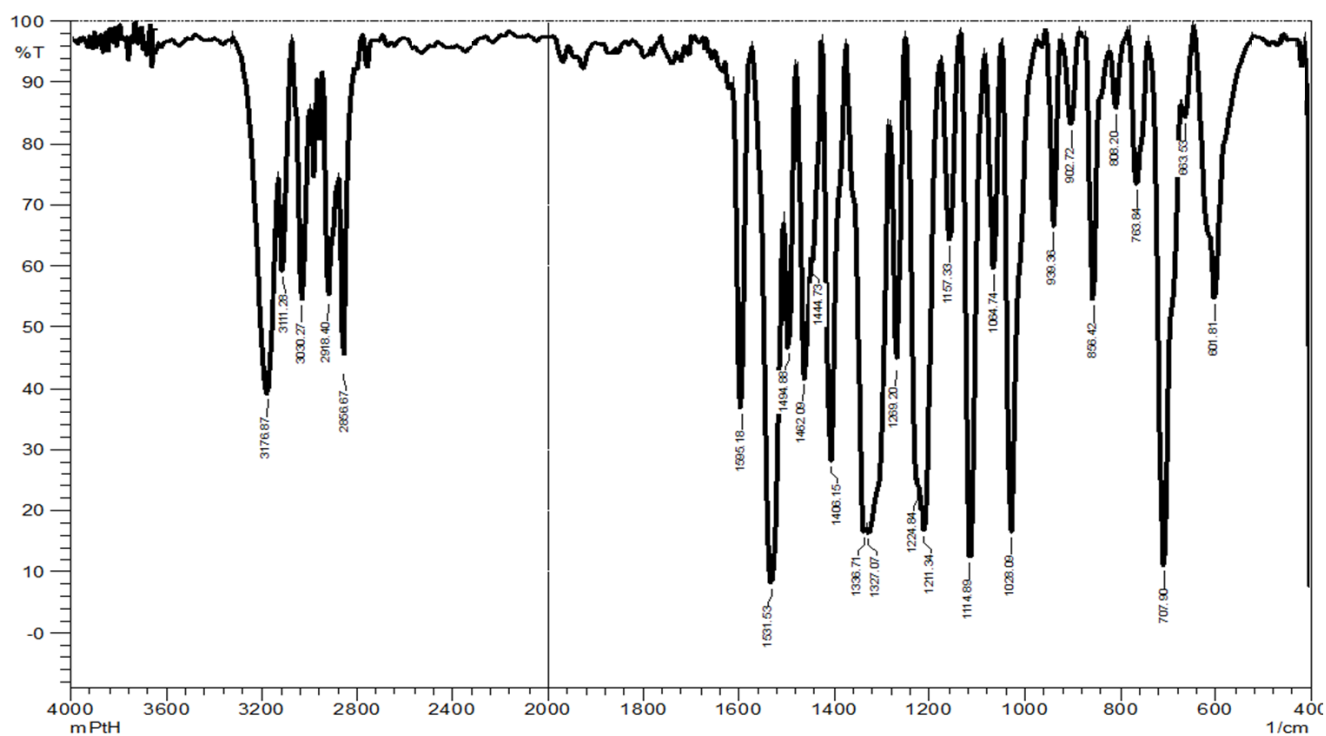

**Fig. S1A:** Theoretical IR spectrum of complex **HPMCT** ligand

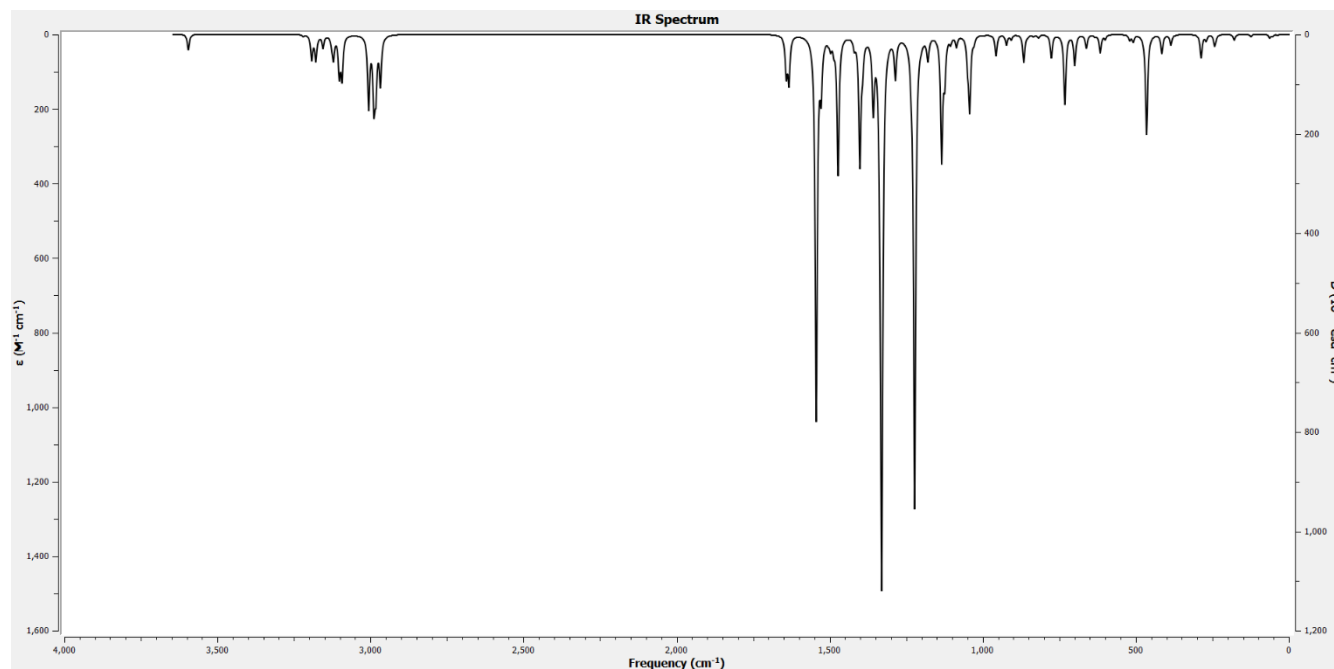

**Fig. S2 : IR spectrum of complex 1**

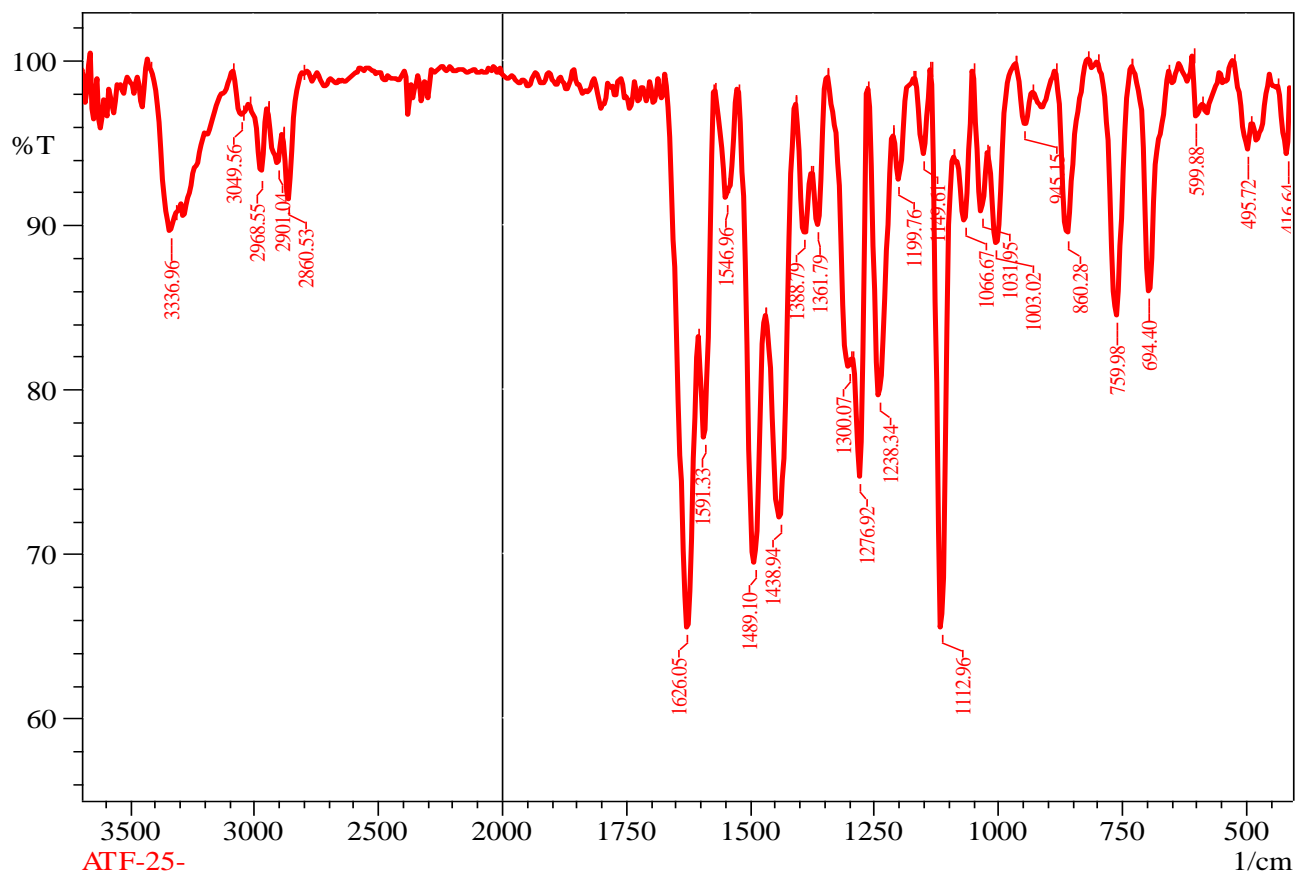

**Fig. S3 : IR spectrum of complex 2**

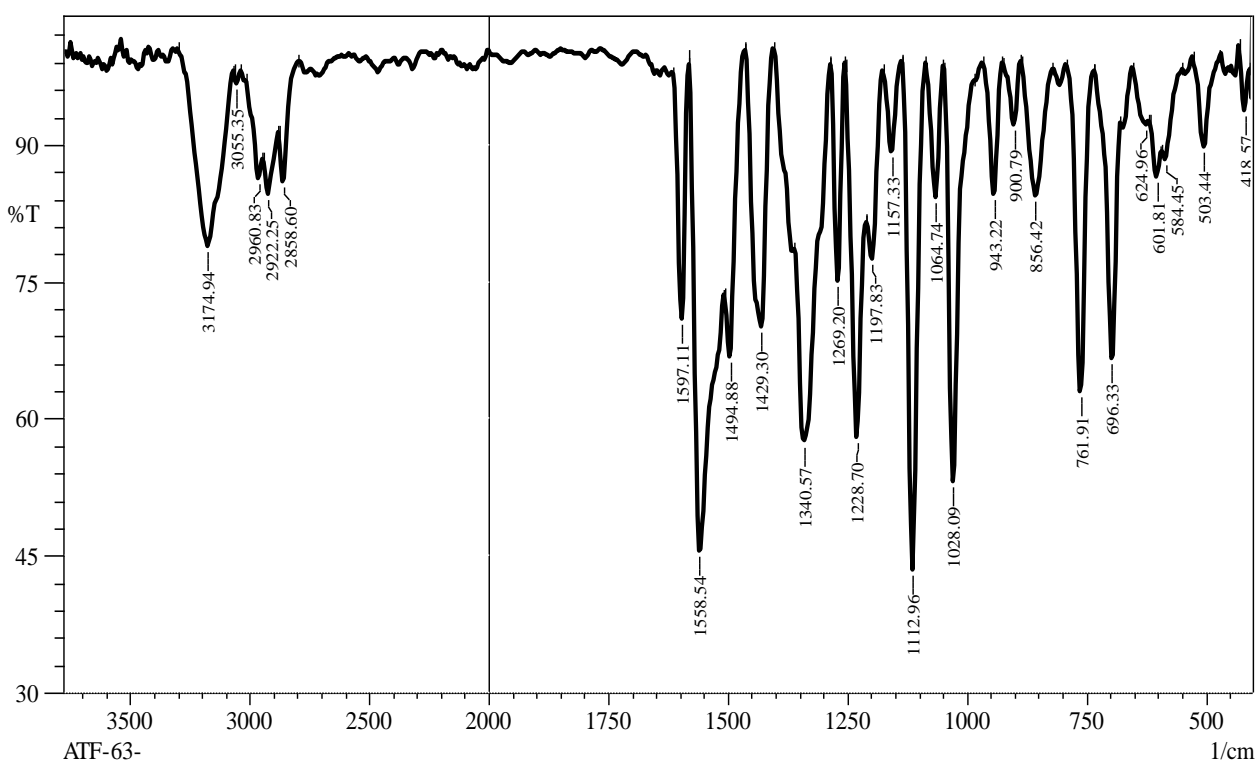

Fig. S3A: Theoretical: IR spectrum of complex **2**

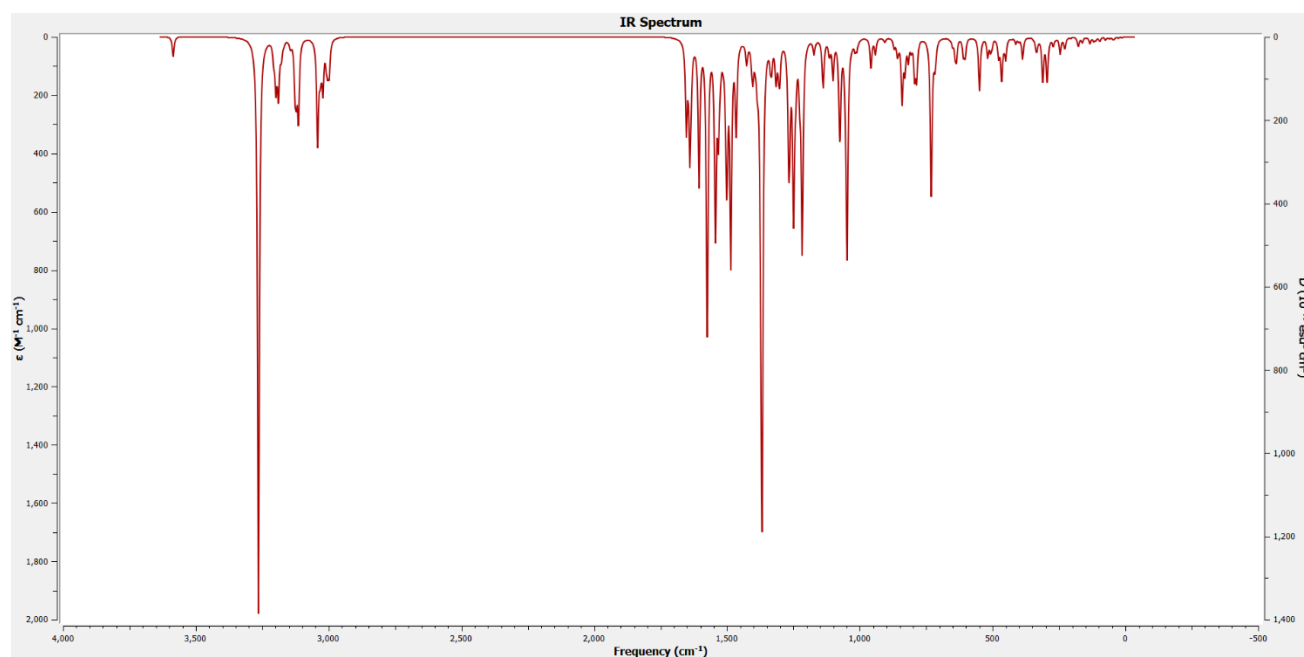

Fig. S4 : IR spectrum of complex **3**

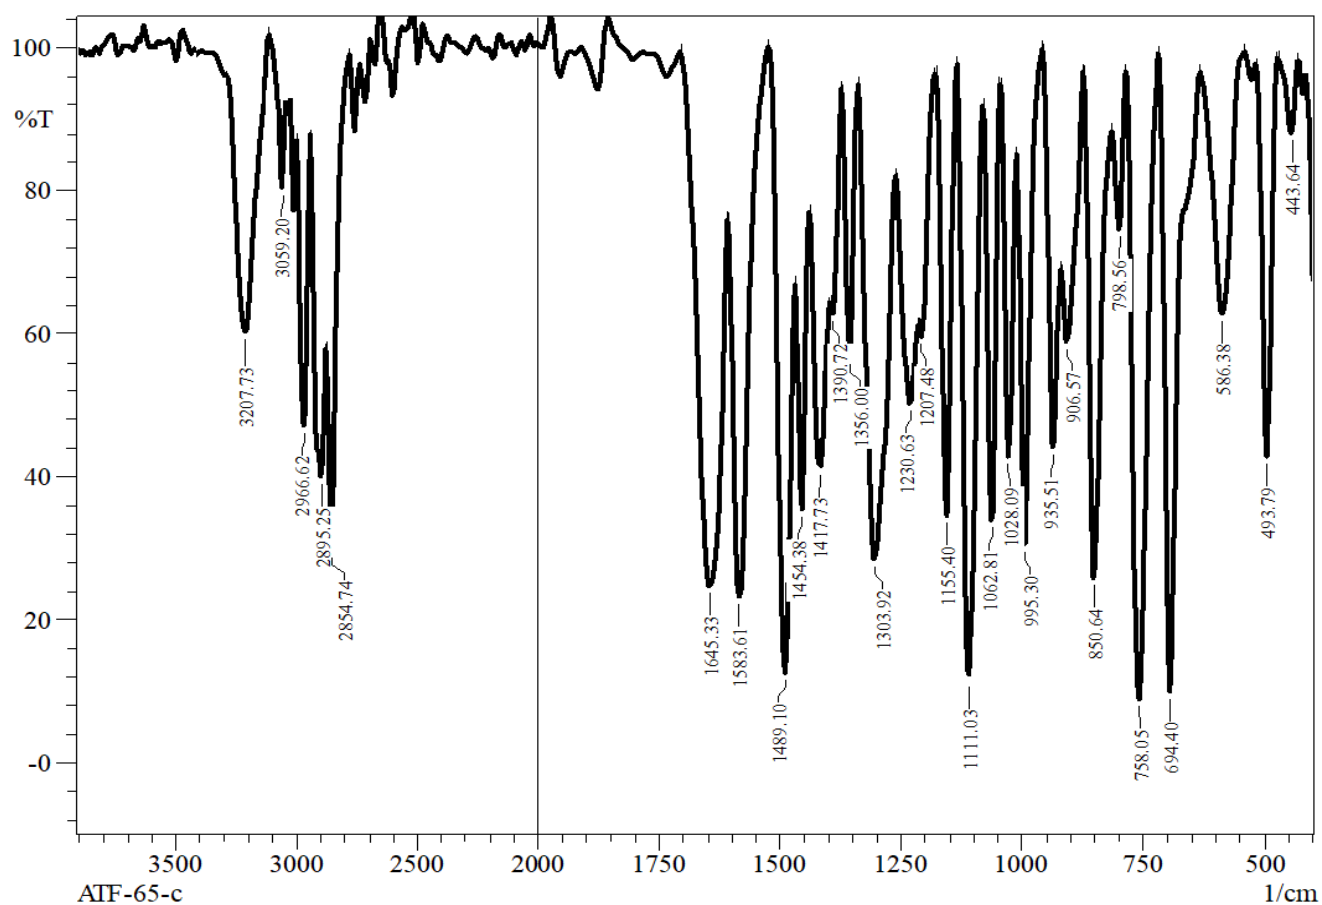

Fig. S4A: Theoretical: IR spectrum of complex 3

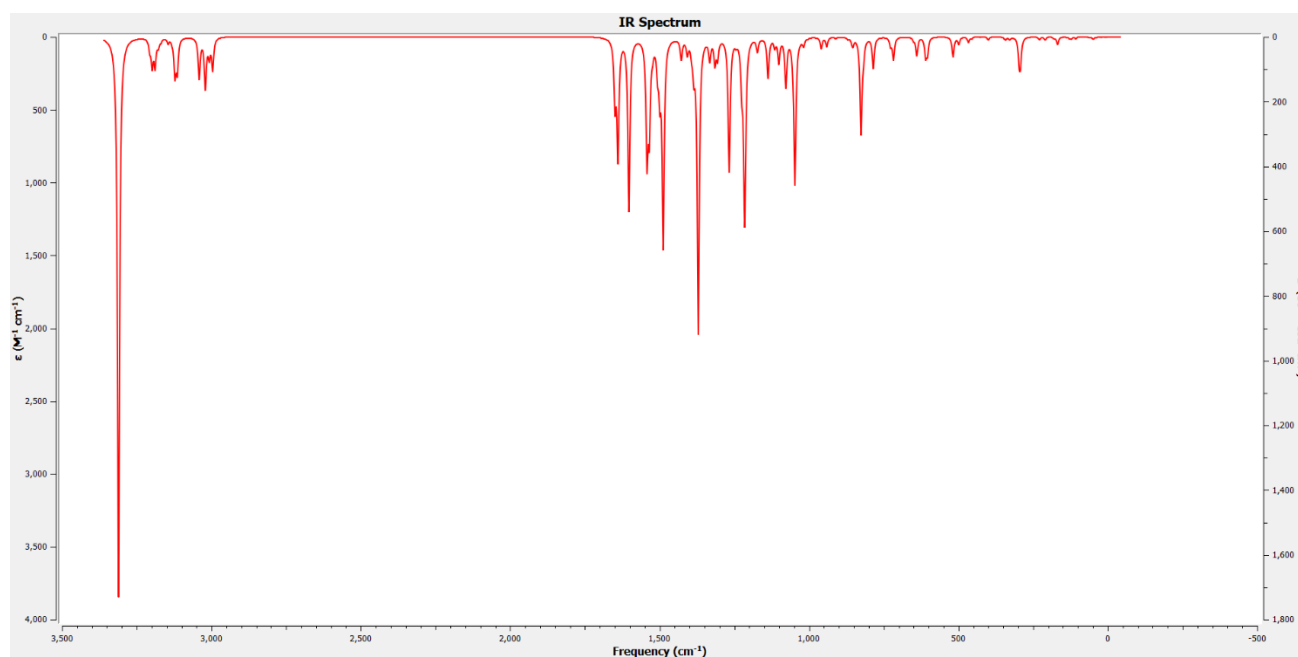

Fig. S5 : IR spectrum of complex 4

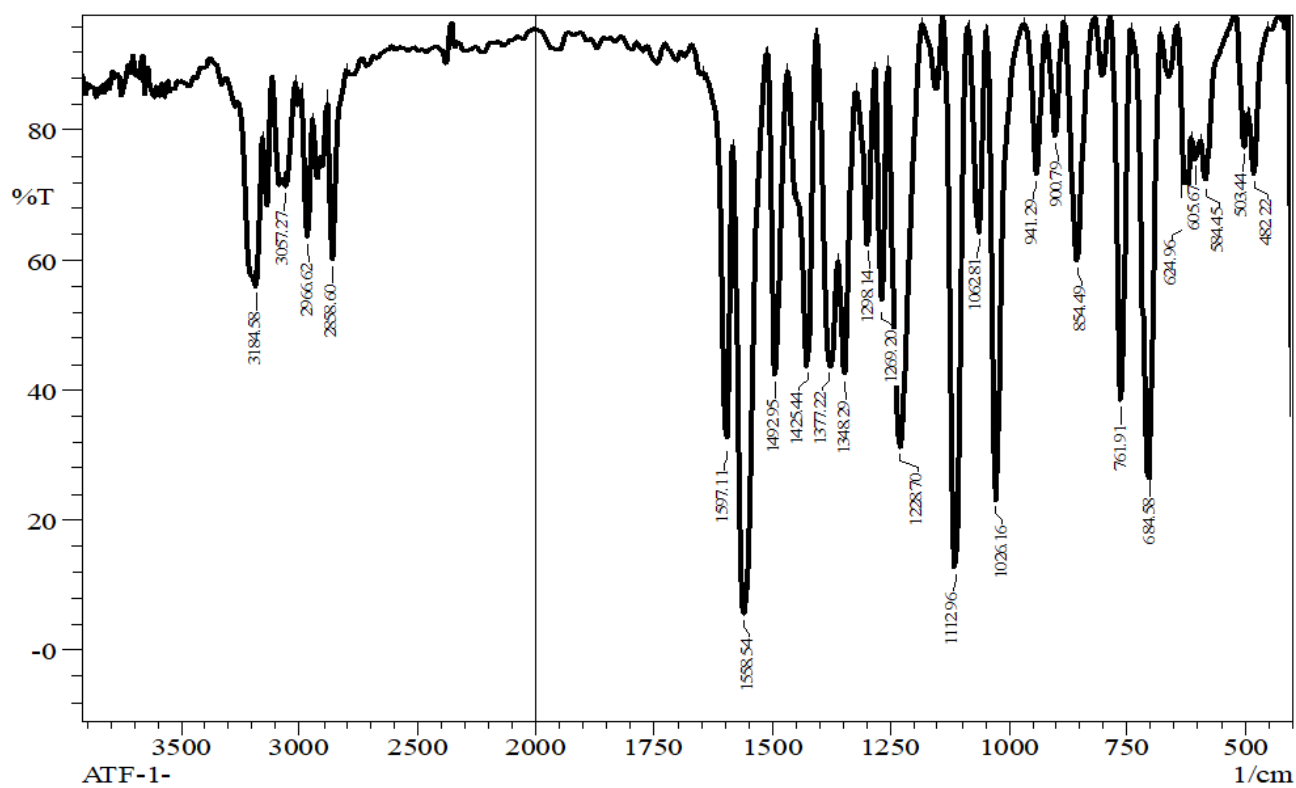

**Fig. S6 : IR spectrum of complex 5**

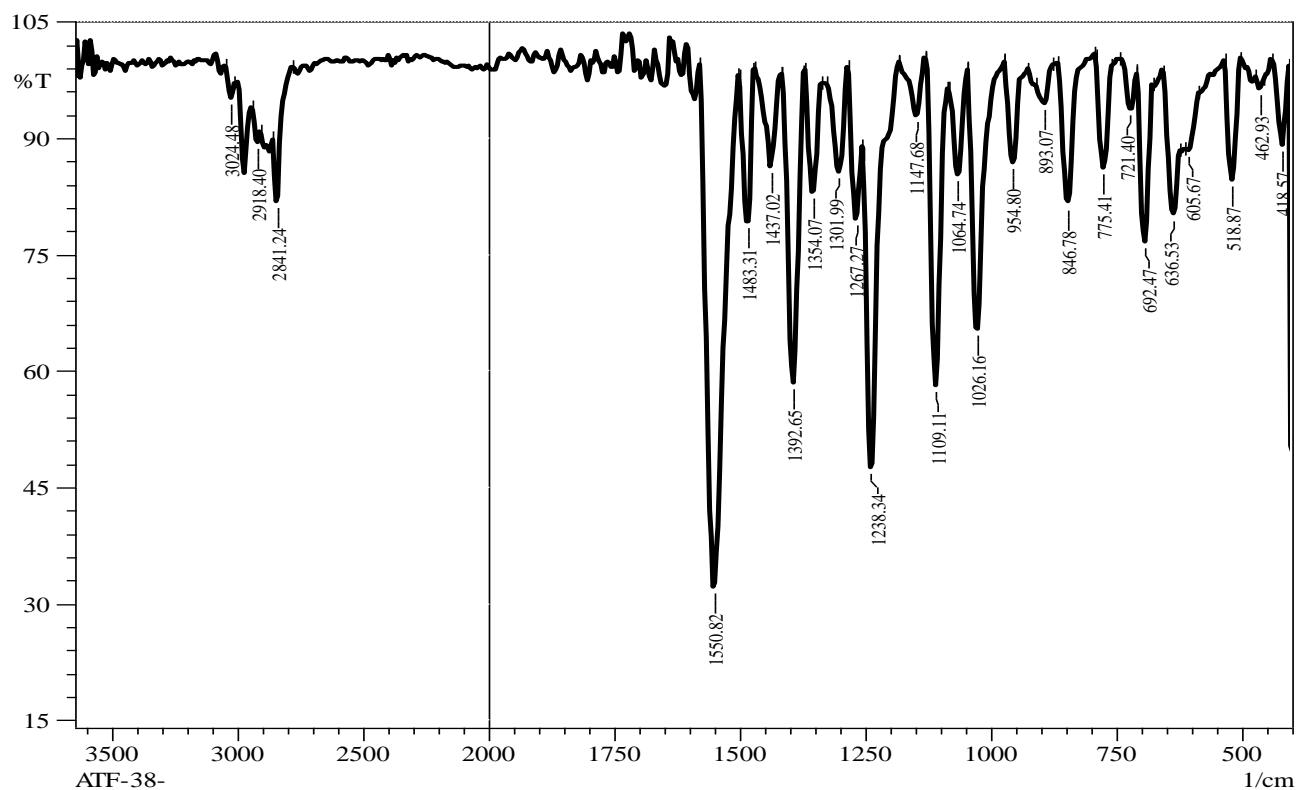

**Fig. S6A: Theoretical: IR spectrum of complex 5**

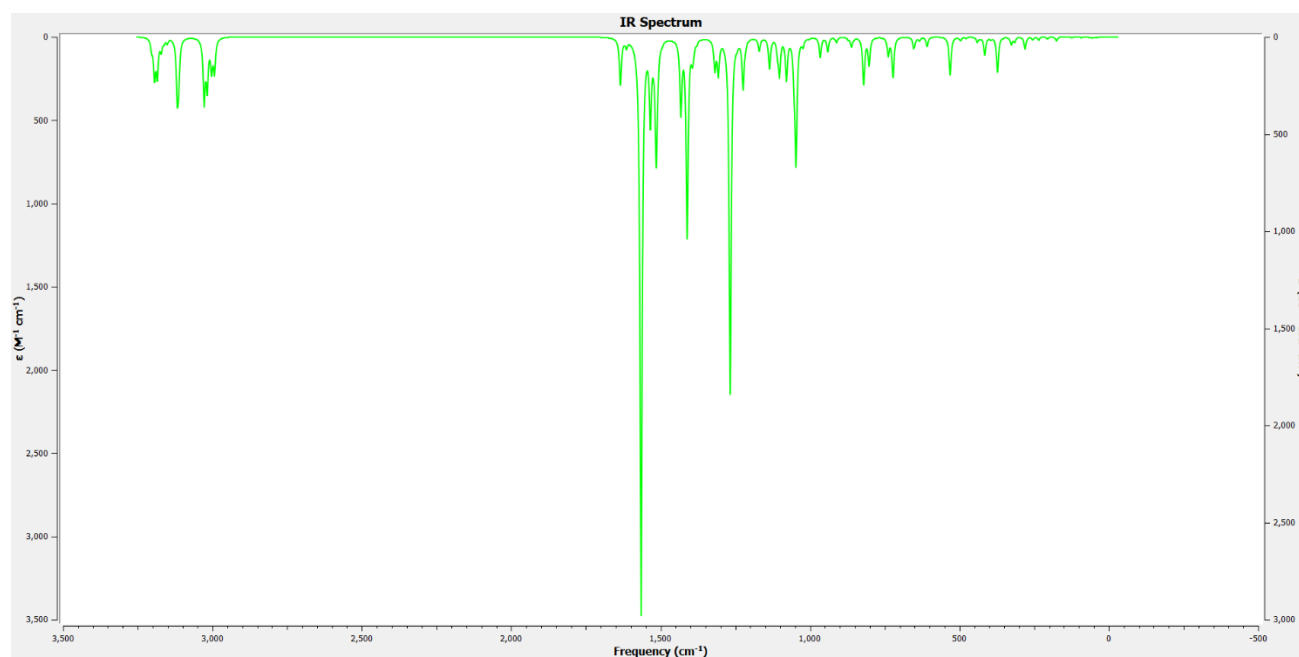

**Fig. S7 : IR spectrum of complex 6**

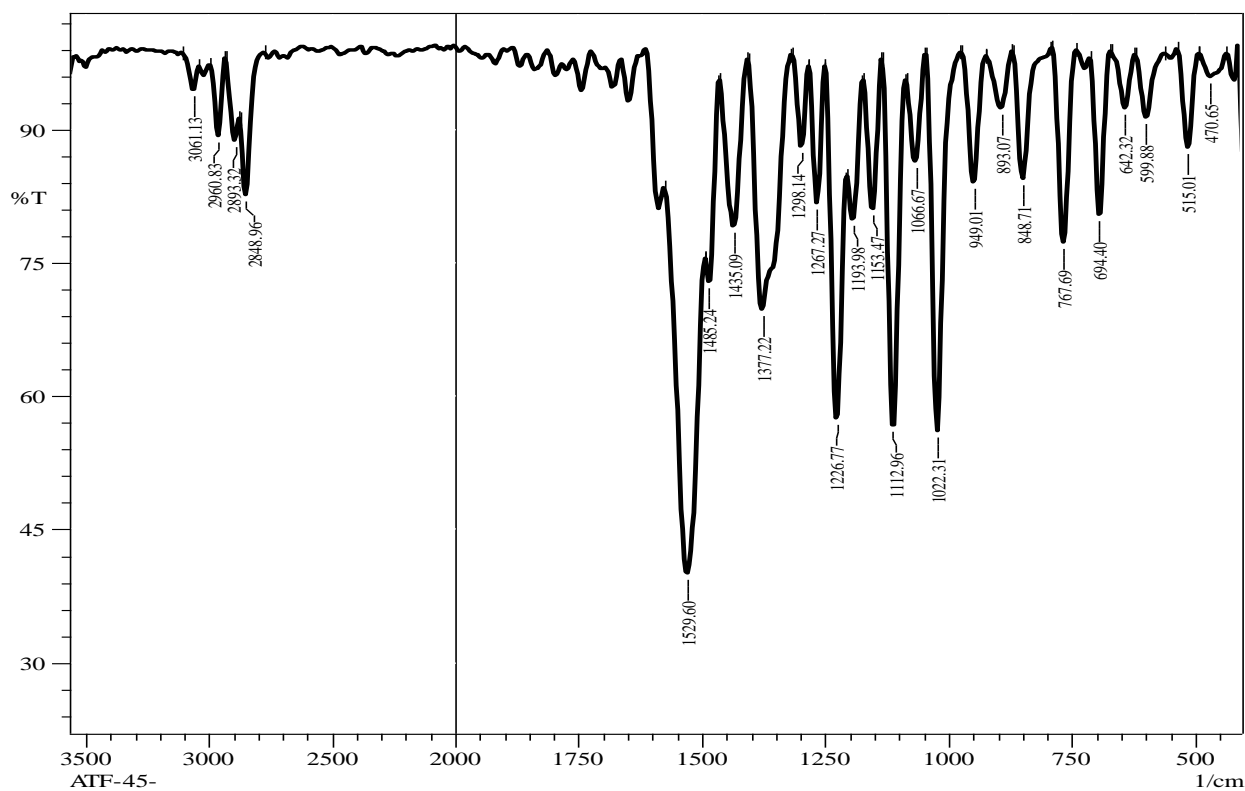

**Fig. S8 : IR spectrum of complex 7**

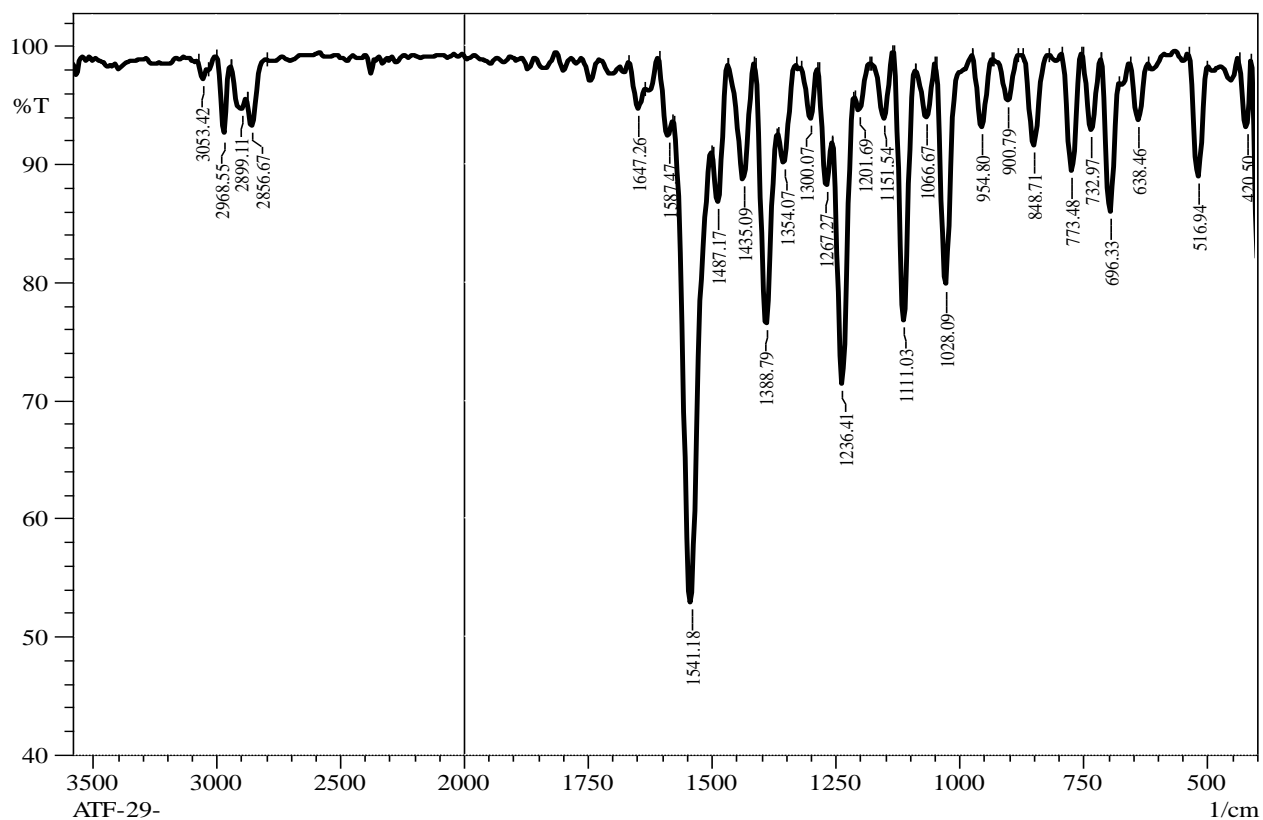

**Fig. S7A: Theoretical: IR spectrum of complex 7**

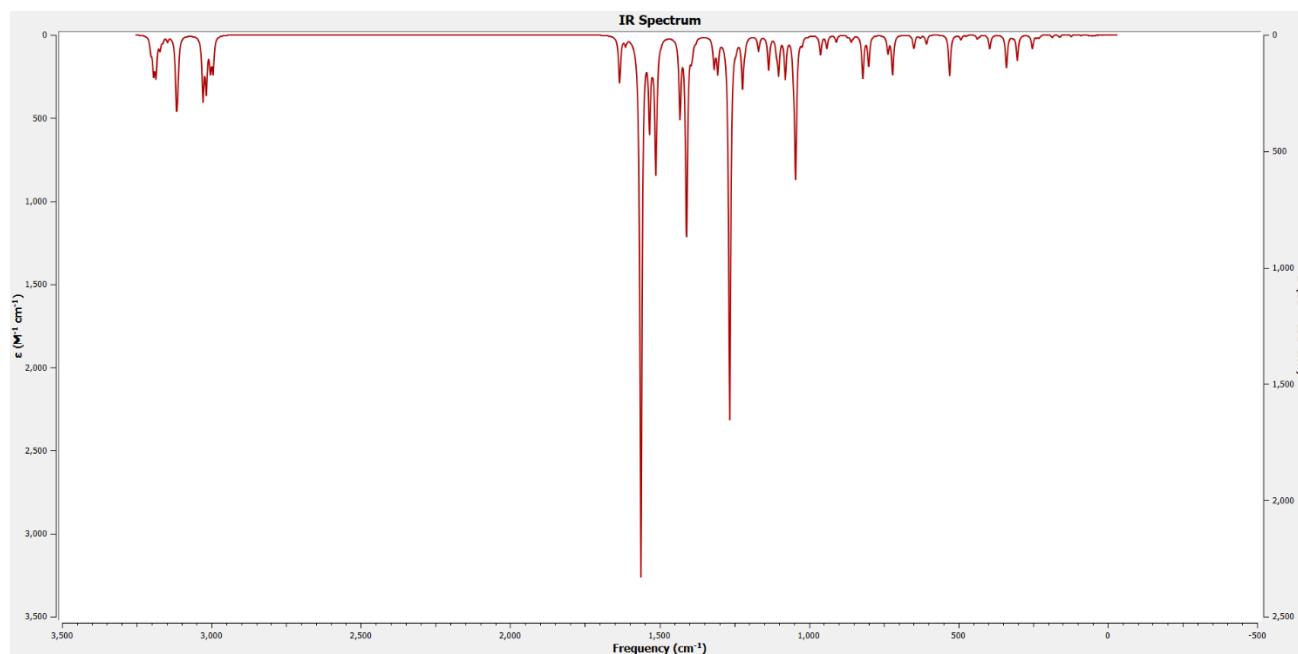

**Fig. S9 : IR spectrum of complex 8**



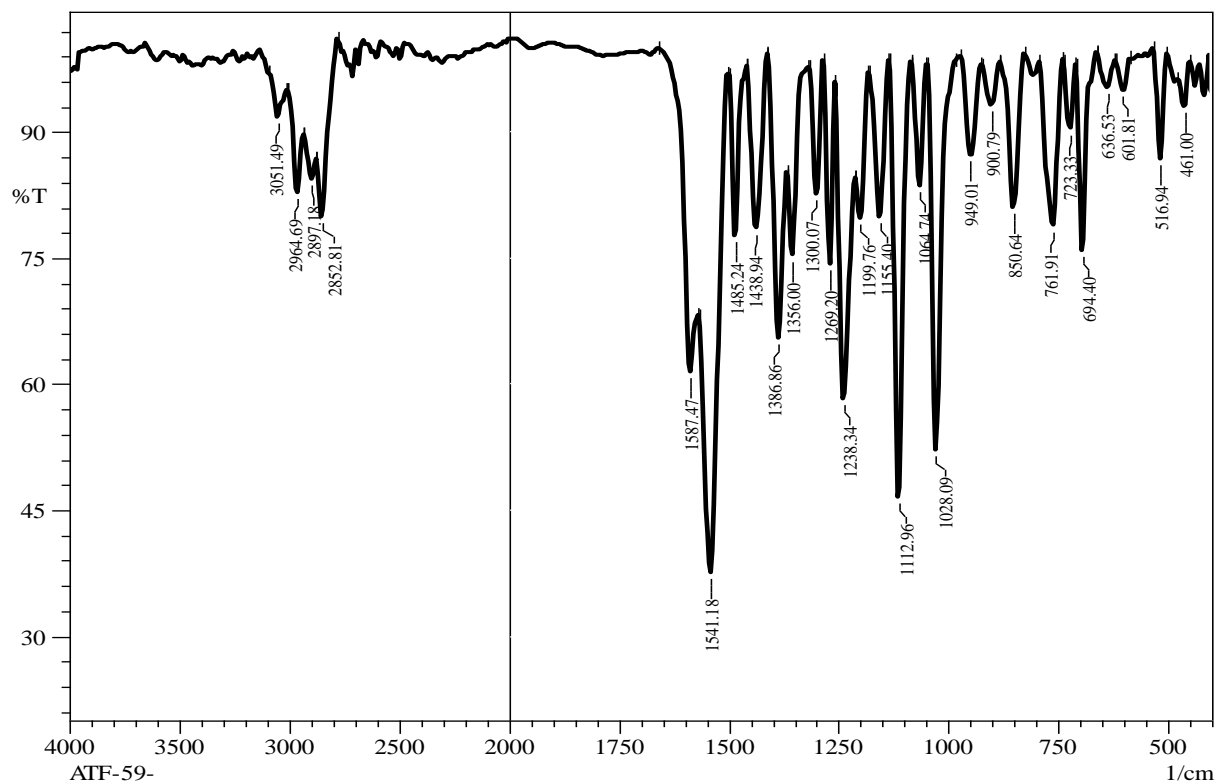

Fig. S9A: Theoretical: IR spectrum of complex **8**

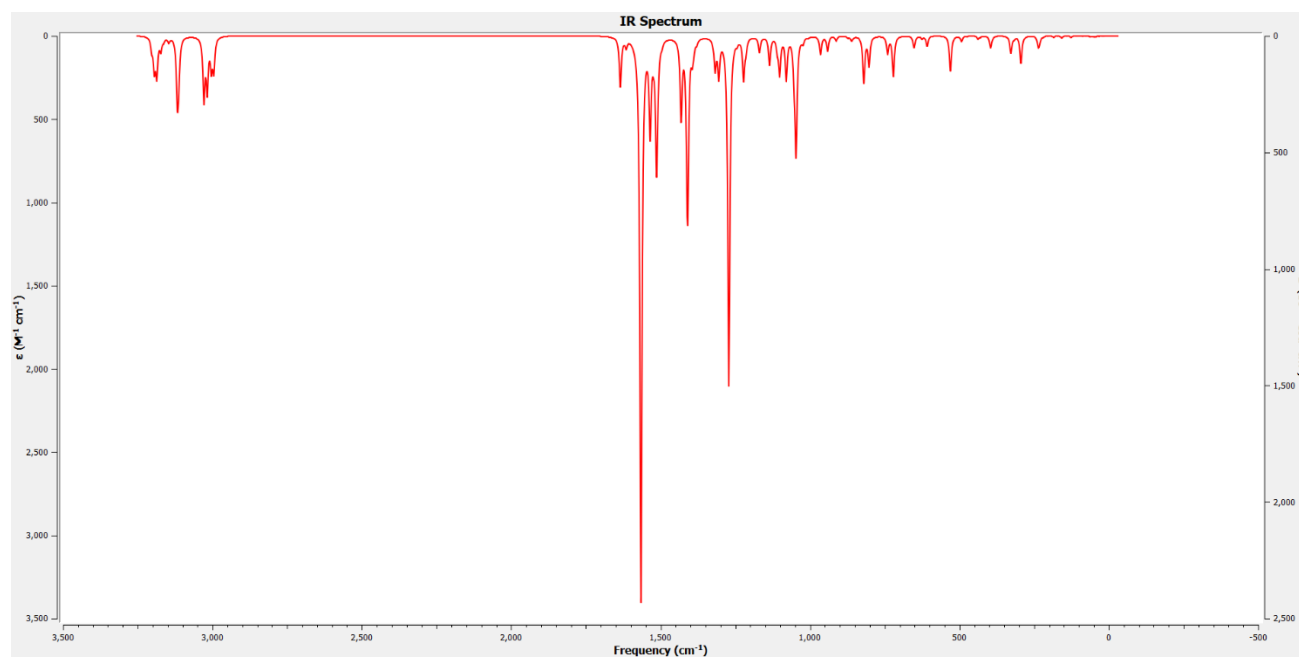

Fig. S9 : IR spectrum of complex **9**

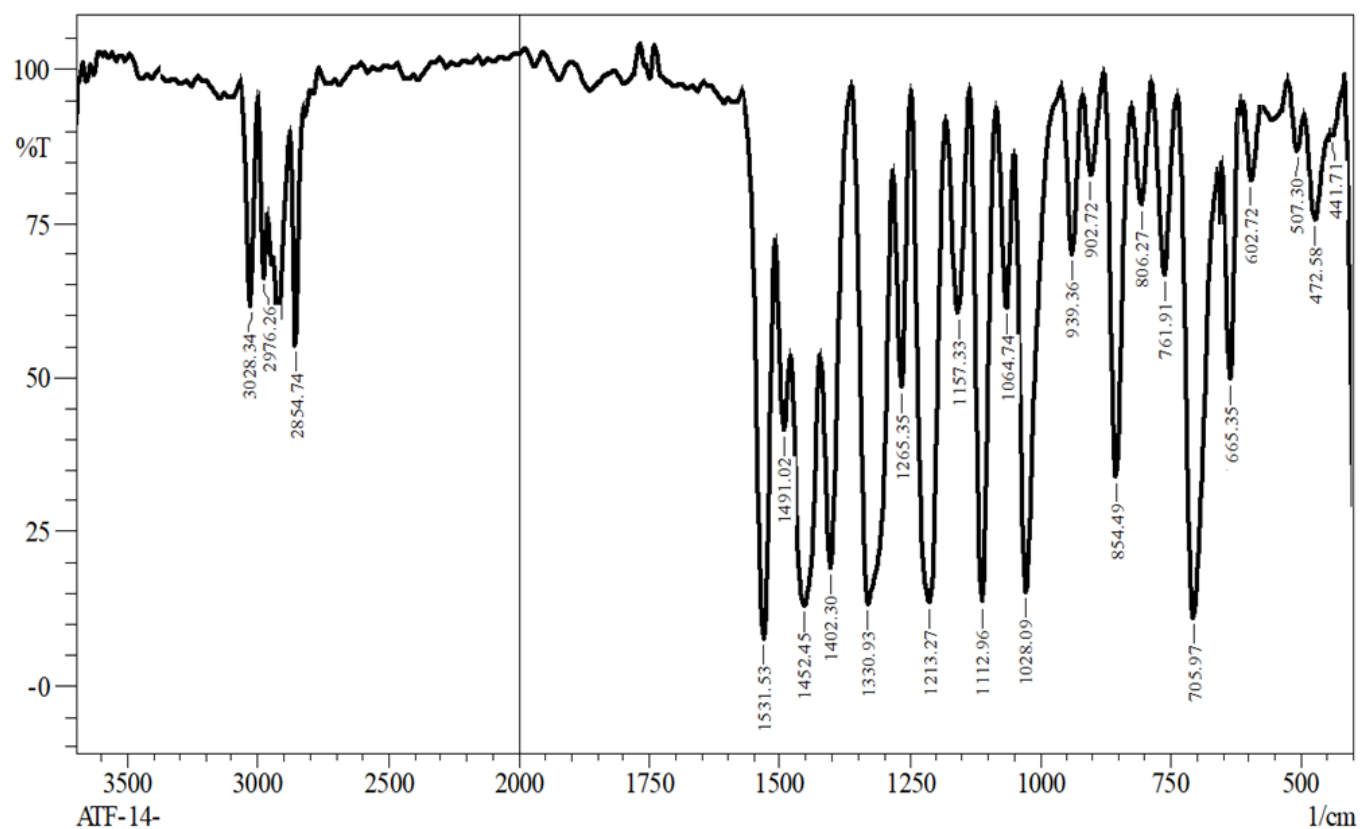

Fig. S10 : IR spectrum of complex **10**

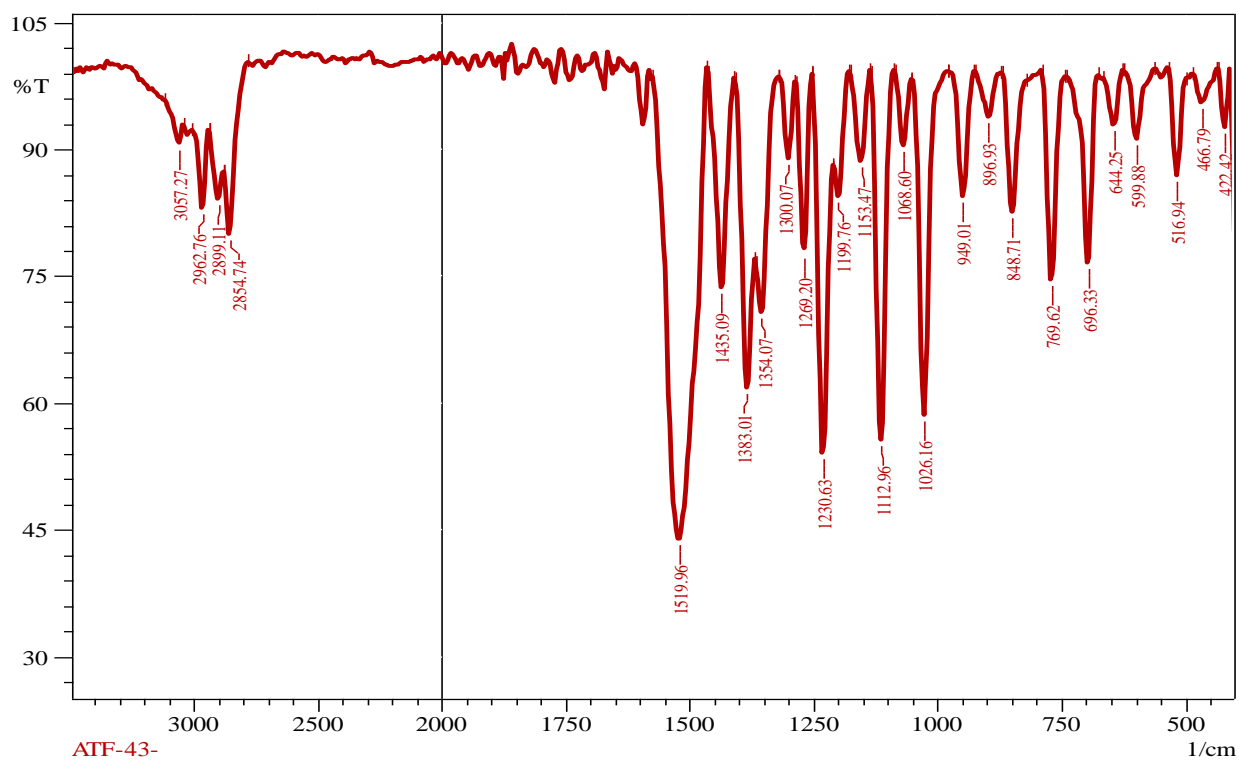

Fig. S11 : IR spectrum of complex **11**

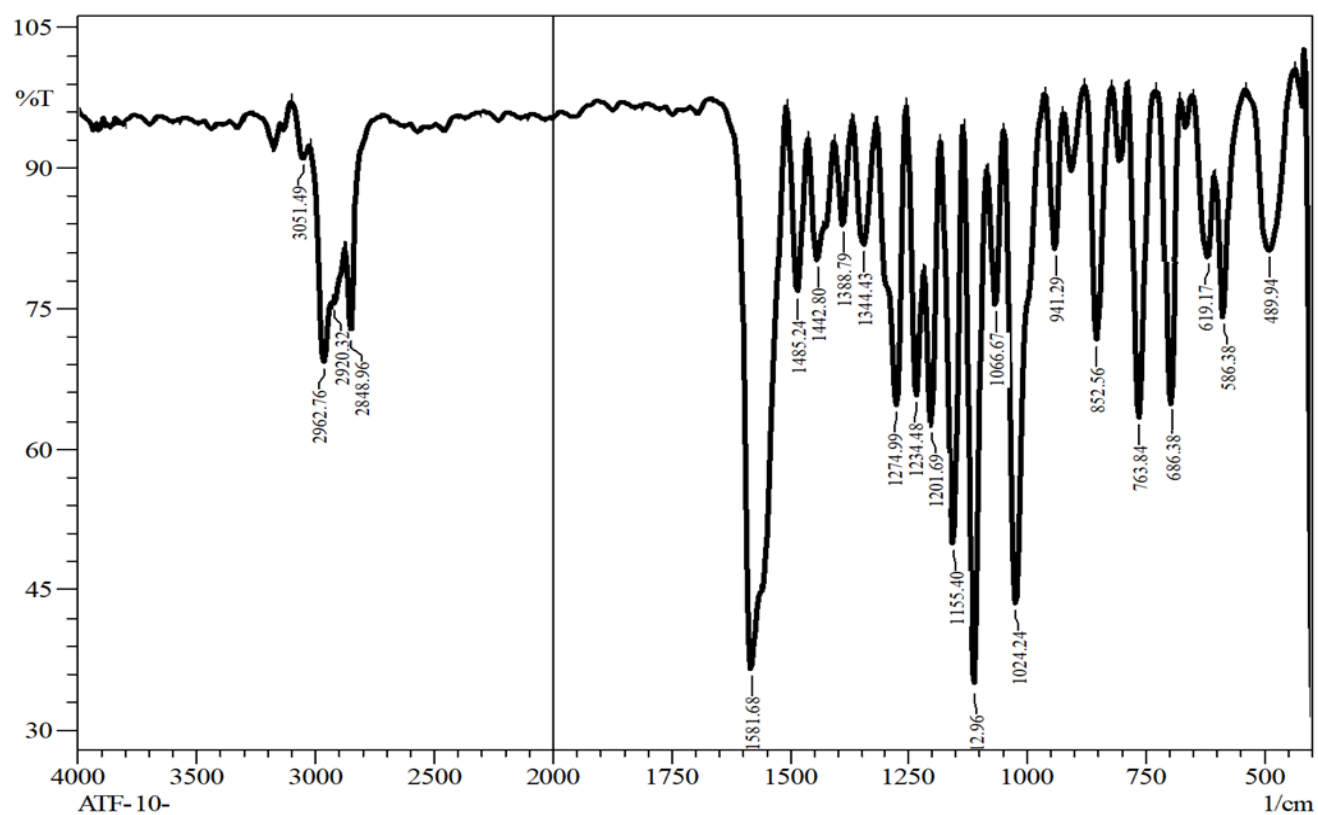

Fig. S12 :  $^1\text{H}$  NMR spectrum of **HPMCT**

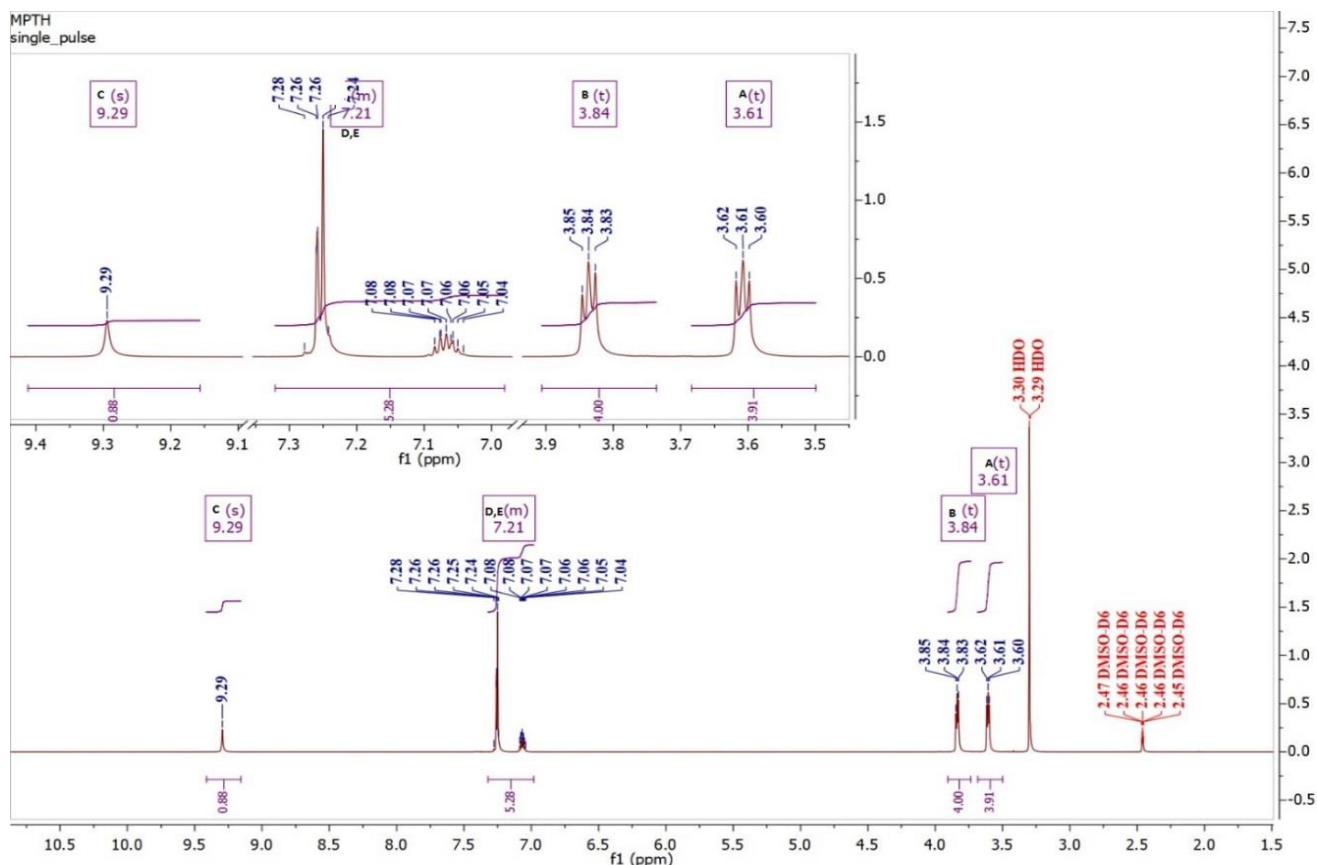

Fig. S13 :  $^1\text{H}$  NMR spectrum of complex **2**

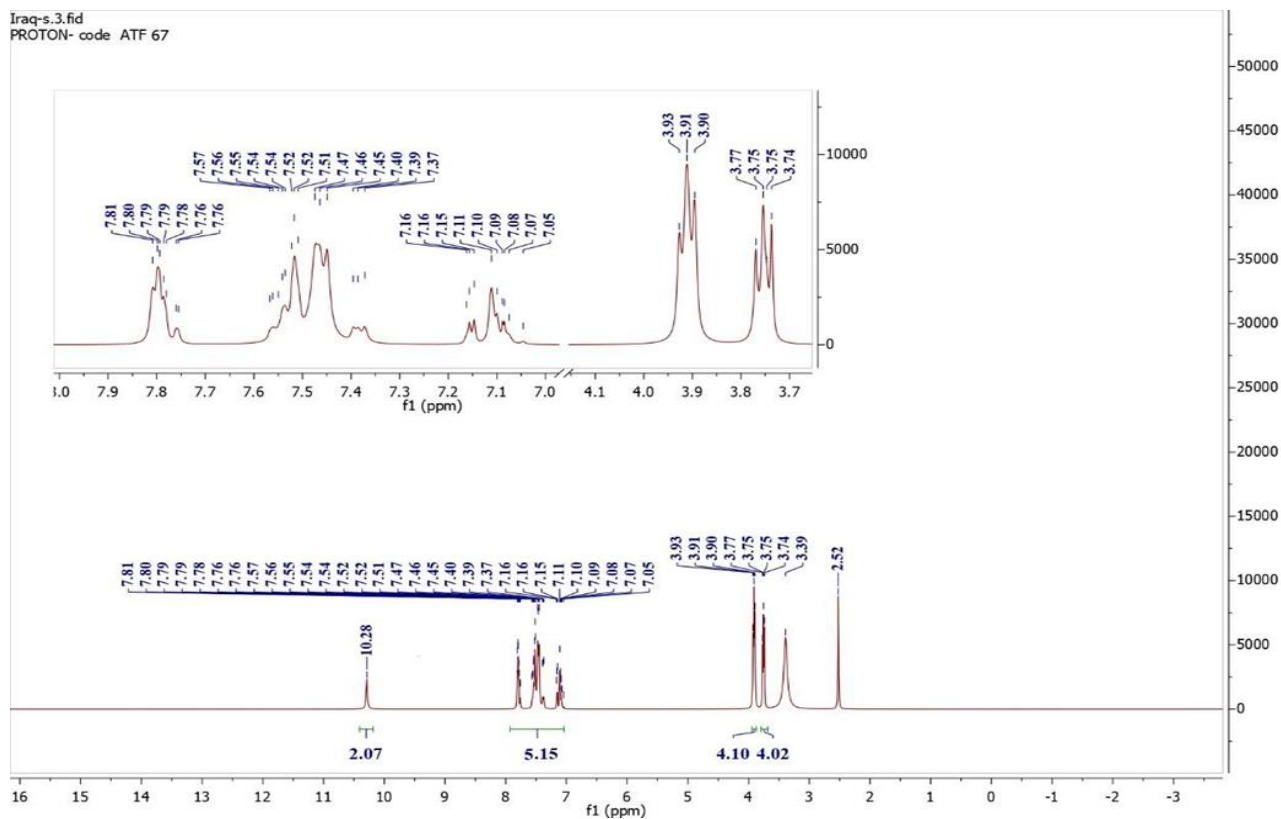

Fig. S14 :  $^1\text{H}$  NMR spectrum of complex **3**

### Supplementary information

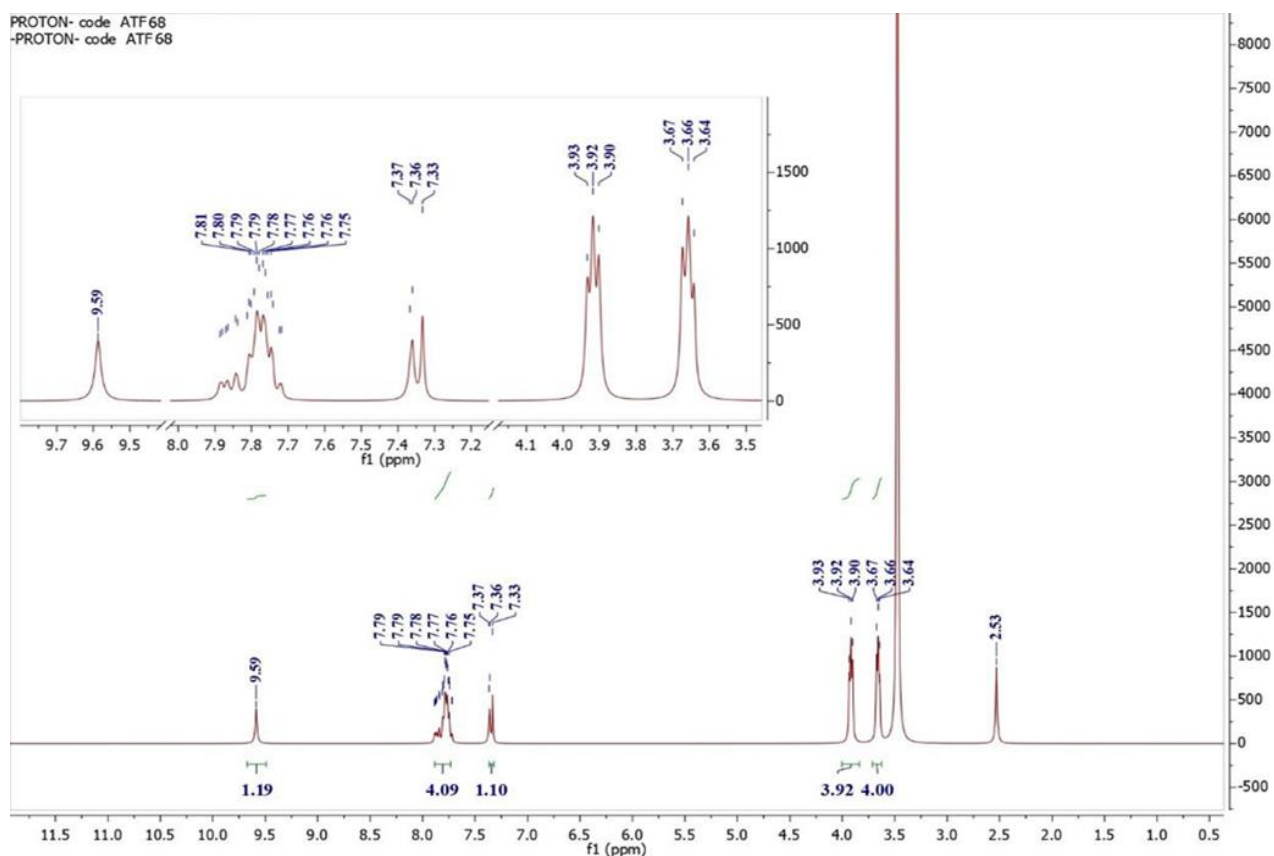

**Fig. S15 :  $^1\text{H}$  NMR spectrum of complex 4**

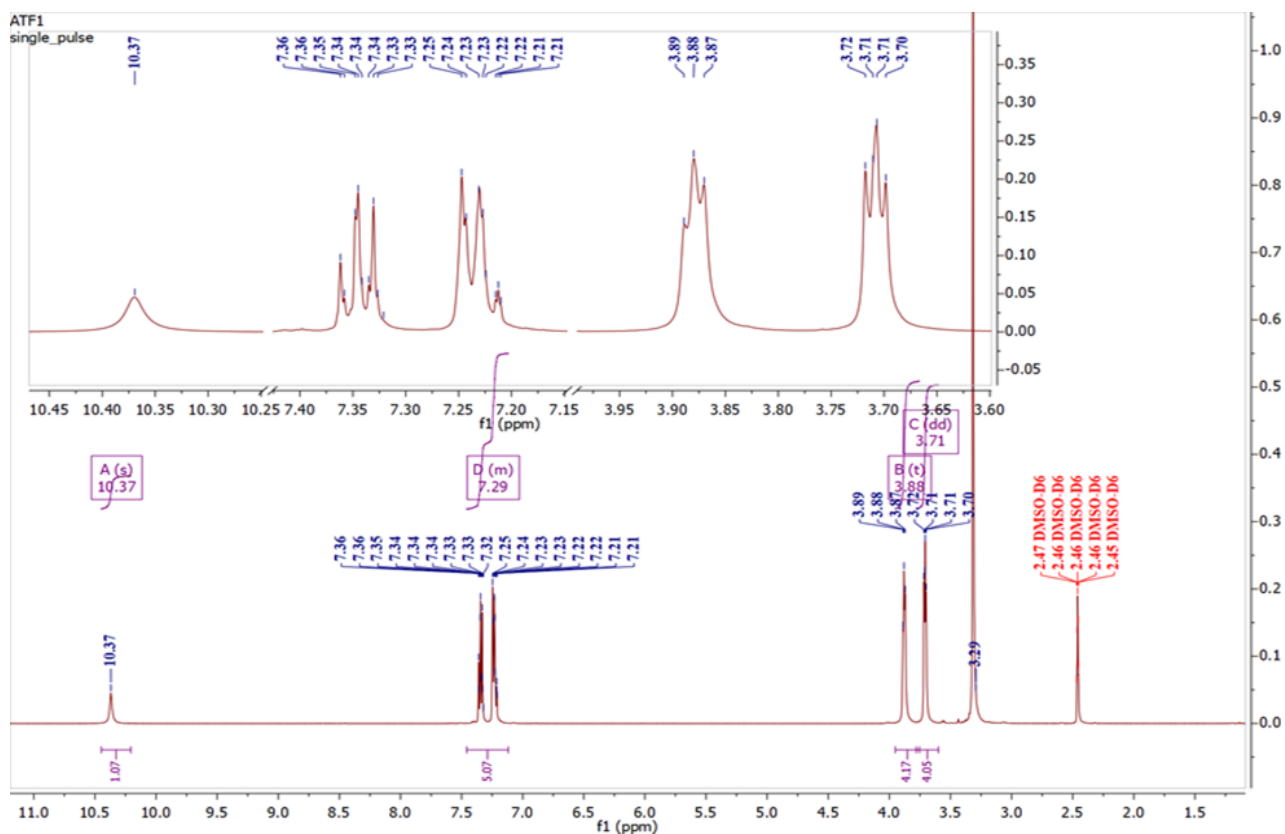

**Fig. S16 :**  $^1\text{H}$  NMR spectrum of complex **7**

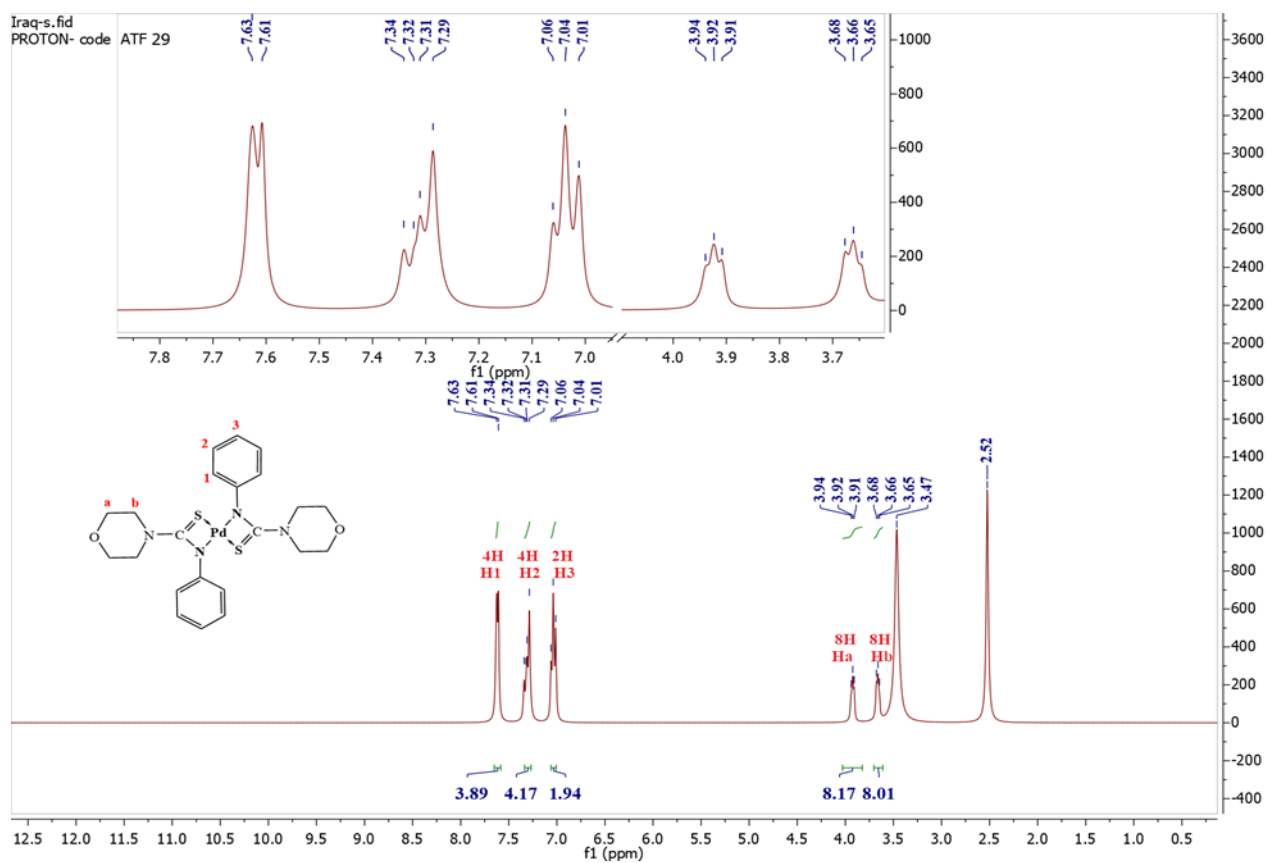

**Fig. S17** :  $^1\text{H}$  NMR spectrum of complex **8**

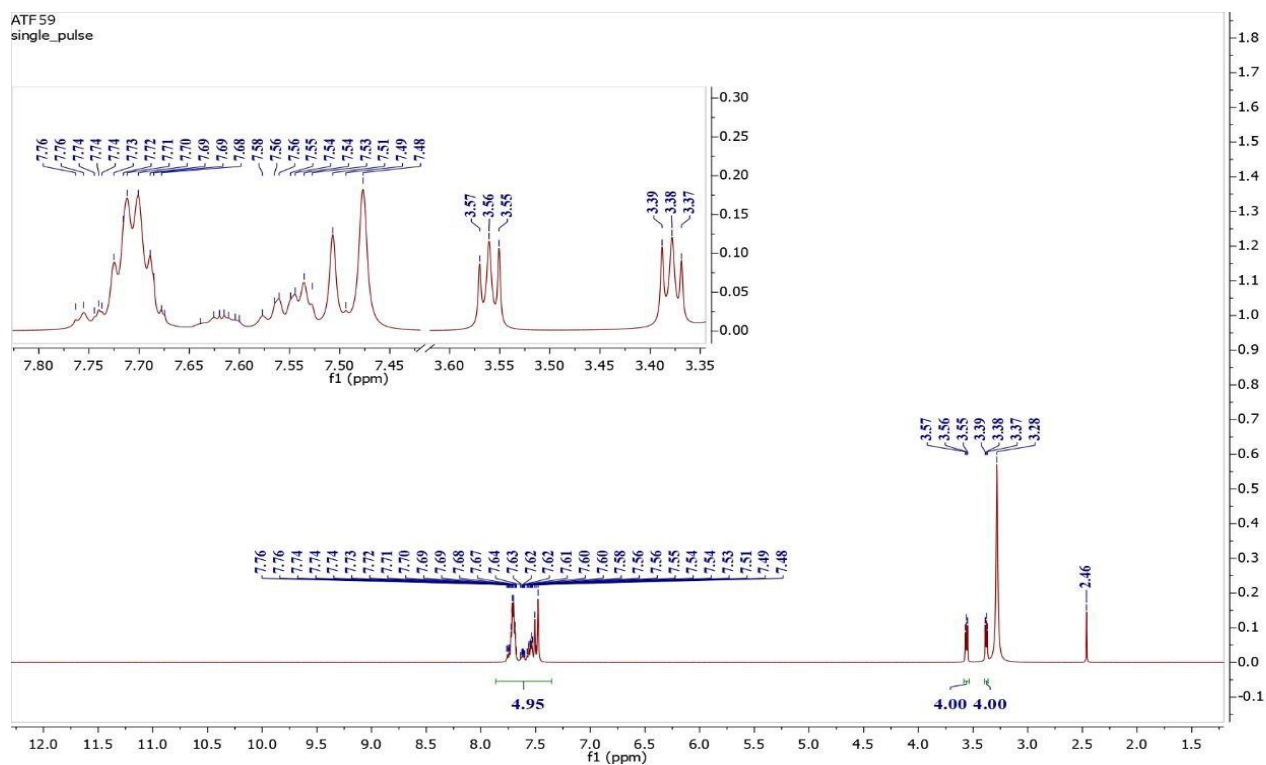

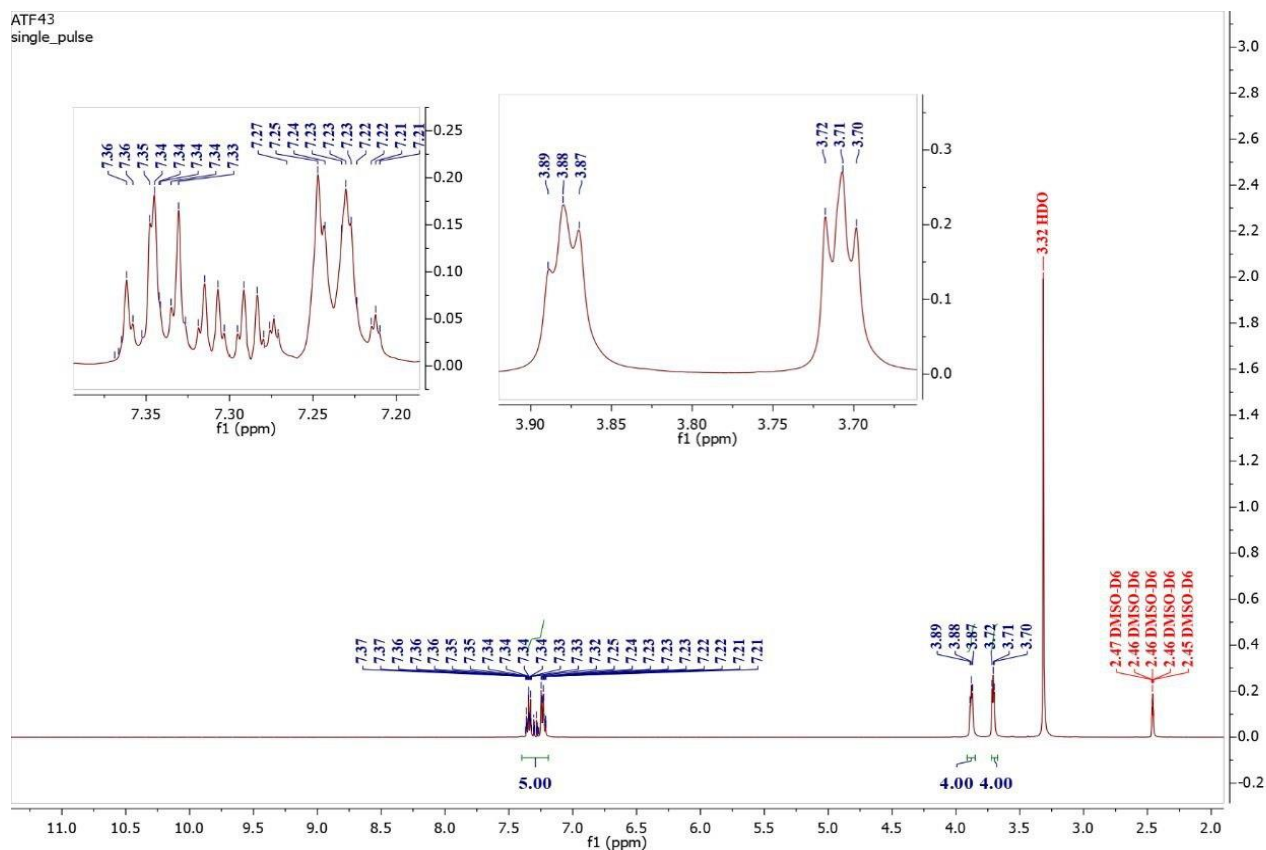

Fig. S19 :  $^1\text{H}$  NMR spectrum of complex **11**

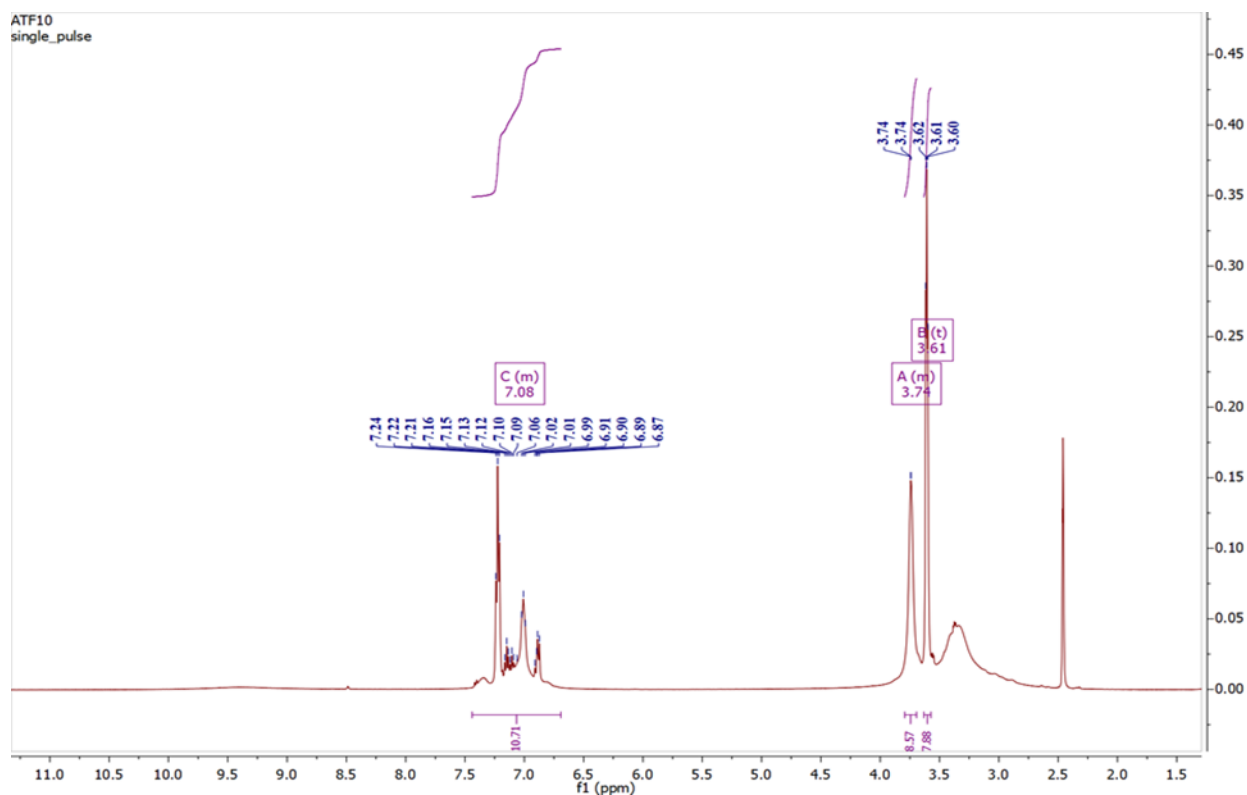

Fig. S20 :  $^{13}\text{C}$  NMR spectrum of **HPMCT**

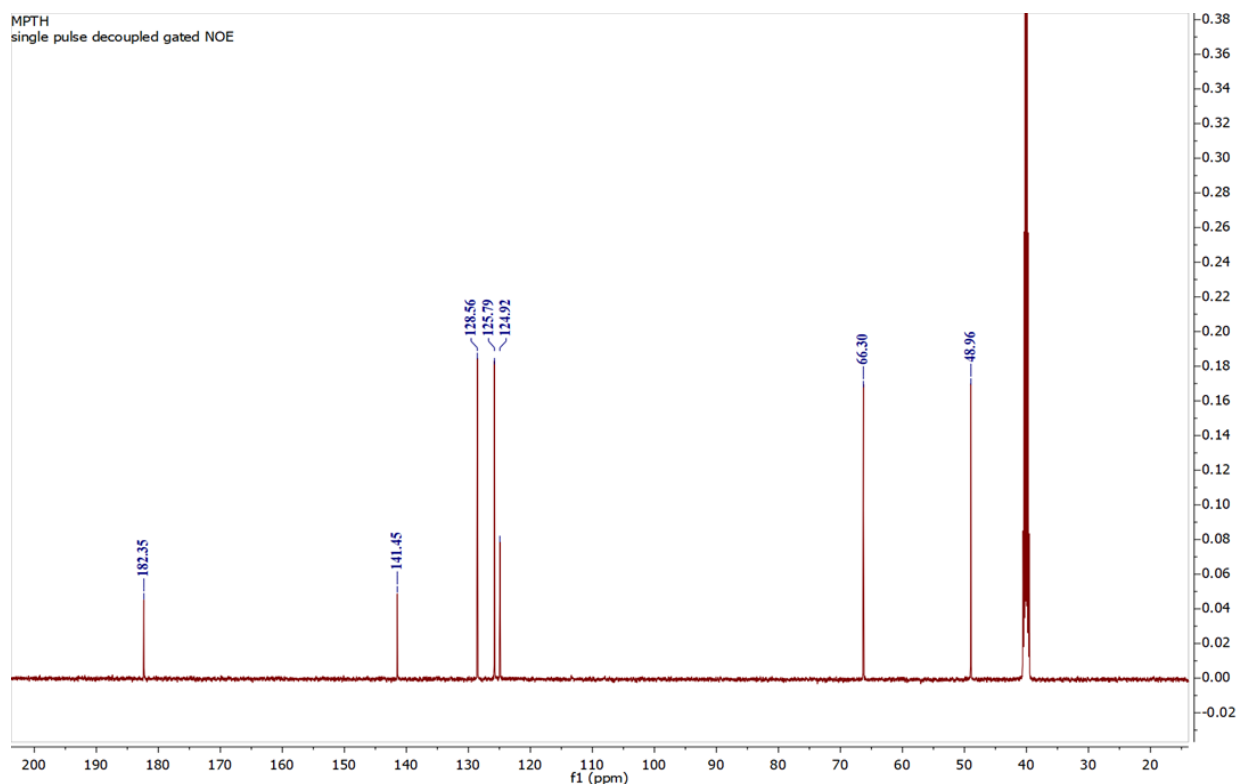

**Fig. S21 :**  $^{13}\text{C}$  NMR spectrum of complex **4**

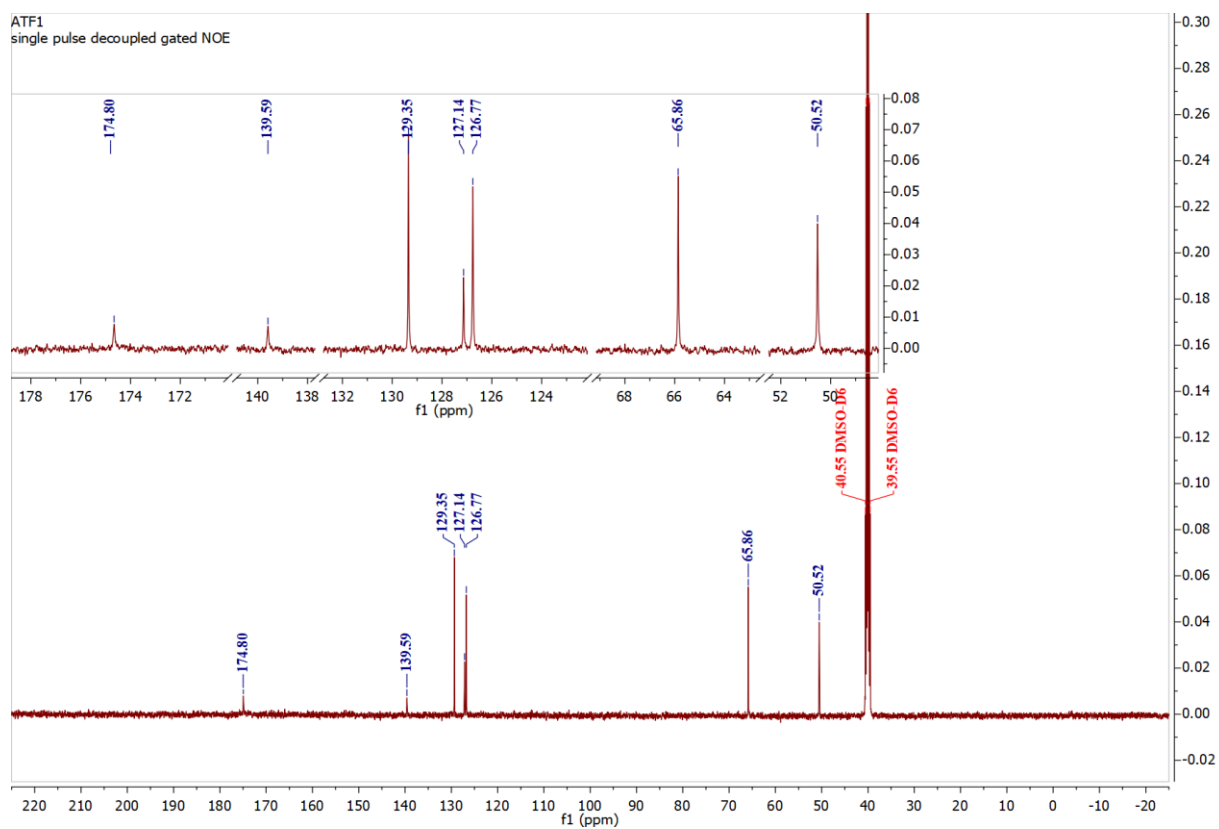

**Fig. S22 :**  $^{13}\text{C}$  NMR spectrum of complex **11**



## Supplementary information

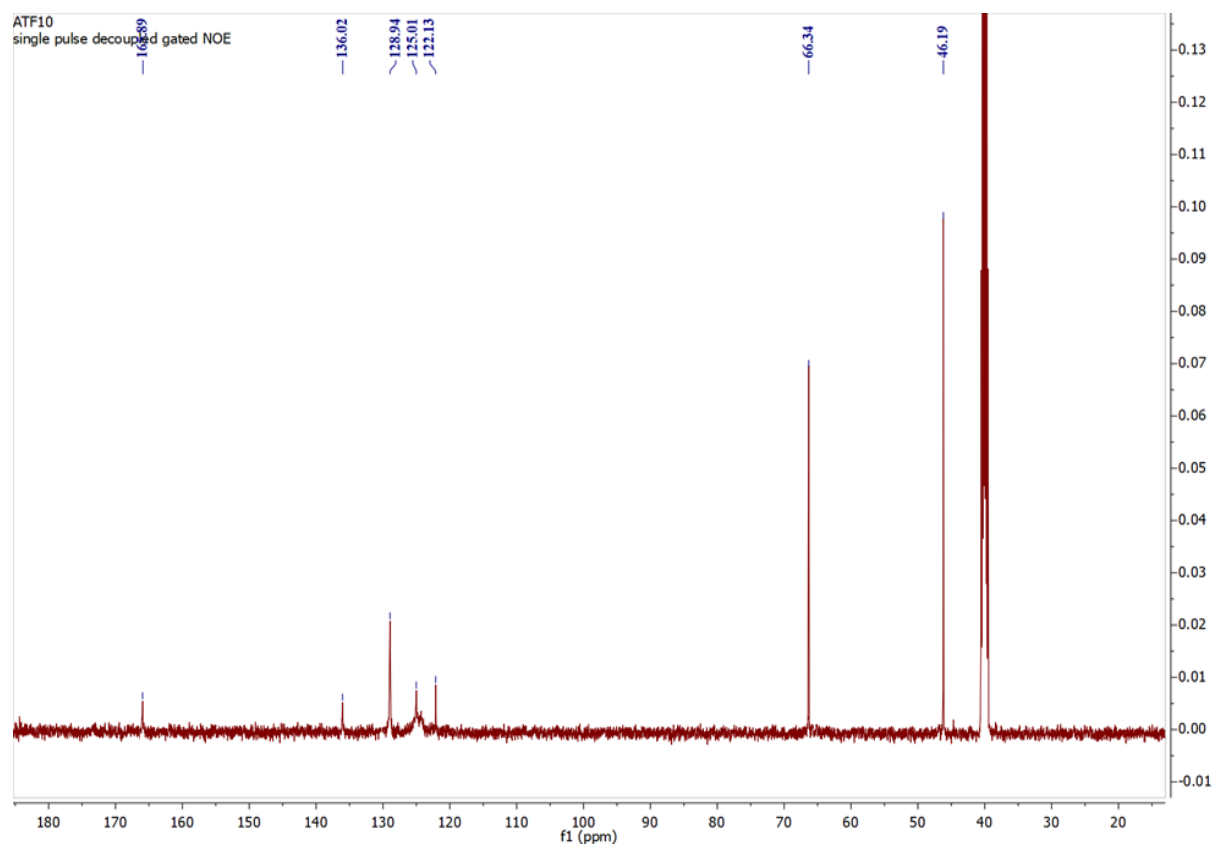

Supplement: s1 [file s1]
